# Supplementary material for: SARS-CoV-2—Morphology, Transmission and Diagnosis during Pandemic, Review with Element of Meta-Analysis
Source: MDPI journal article supplement (doi:10.3390/jcm10091962), 2021-05-03
Supplement: s1 [file s1]

| Number of study | Title                                                                                                                                            | Authors         | Country | N of woman with SARS-CoV-2 | Total neonates vaginal birth | Infected neonates vaginal birth | Total neonates caesarean birth | Infected neonates caesarean birth | Author's conclusion                                                                                                 | Ref. |
|-----------------|--------------------------------------------------------------------------------------------------------------------------------------------------|-----------------|---------|----------------------------|------------------------------|---------------------------------|--------------------------------|-----------------------------------|---------------------------------------------------------------------------------------------------------------------|------|
| 1               | Pregnancy Outcomes Among Women With and Without Severe Acute Respiratory Syndrome Coronavirus 2 Infection                                        | Adhikari et al. | USA     | 188                        | 123                          | 5                               | 65                             | 1                                 | Neonatal infection may be as high as 3% and may occur predominantly among asymptomatic or mildly symptomatic women. | 169  |
| 2               | Clinical profile, viral load, management and outcome of neonates born to COVID 19 positive mothers: a tertiary care centre experience from India | Anand et al.    | India   | 65                         | 39                           | 4                               | 26                             | 3                                 | Risk of transmission from COVID 19 positive mother to neonate by rooming-in and breastfeeding is low.               | 170  |
| 3               | Maternal COVID-19 infection, clinical characteristics, pregnancy, and neonatal outcome:                                                          | Antoun et al.   | UK      | 19                         | 3                            | 0                               | 16                             | 0                                 | COVID-19 infection was not found in the newborns and                                                                | 171  |

| Number of study | Title                                                                                                                               | Authors        | Country | N of woman with SARS-CoV-2 | Total neonates vaginal birth | Infected neonates vaginal birth | Total neonates caesarean birth | Infected neonates caesarean birth | Author's conclusion                                                                                                                                              | Ref. |
|-----------------|-------------------------------------------------------------------------------------------------------------------------------------|----------------|---------|----------------------------|------------------------------|---------------------------------|--------------------------------|-----------------------------------|------------------------------------------------------------------------------------------------------------------------------------------------------------------|------|
|                 | A prospective cohort study                                                                                                          |                |         |                            |                              |                                 |                                |                                   | none developed severe neonatal complications.                                                                                                                    |      |
| 4               | Maternal and perinatal characteristics and outcomes of pregnancies complicated with COVID-19 in Kuwait                              | Ayed et al.    | Kuwait  | 165                        | 86                           | 0                               | 79                             | 0                                 | Mother-to-child vertical transmission of SARS-CoV-2 is possible, COVID-19 infection during pregnancy may not lead to unfavorable maternal and neonatal outcomes. | 172  |
| 5               | Clinical Profile, Viral Load, Maternal-Fetal Outcomes of Pregnancy With COVID-19: 4-Week Retrospective, Tertiary Care Single-Centre | Bachani et al. | India   | 83                         | 57                           | 4                               | 26                             | 1                                 | The potential mother-to-child vertical/horizontal transmission needs further study.                                                                              | 173  |

| Number of study   | Title                                                                                                                                                                       | Authors        | Country | N of woman with SARS-CoV-2 | Total neonates vaginal birth | Infected neonates vaginal birth | Total neonates caesarea n birth | Infected neonates caesarean birth | Author's conclusion                                                                                                           | Ref. |
|-------------------|-----------------------------------------------------------------------------------------------------------------------------------------------------------------------------|----------------|---------|----------------------------|------------------------------|---------------------------------|---------------------------------|-----------------------------------|-------------------------------------------------------------------------------------------------------------------------------|------|
| Descriptive Study |                                                                                                                                                                             |                |         |                            |                              |                                 |                                 |                                   |                                                                                                                               |      |
| 6                 | Epidemiology of coronavirus disease 2019 in pregnancy: risk factors and associations with adverse maternal and neonatal outcomes                                            | Brandt et al.  | USA     | 61                         | 47                           | 0                               | 14                              | 0                                 | Coronavirus disease 2019 during pregnancy is associated with an increased risk of adverse maternal and neonatal outcomes      | 174  |
| 7                 | Coronavirus disease 2019 infection among asymptomatic and symptomatic pregnant women: two weeks of confirmed presentations to an affiliated pair of New York City hospitals | Breslin et al. | USA     | 18                         | 10                           | 0                               | 8                               | 0                                 | There were no confirmed cases of coronavirus disease 2019 detected in neonates upon initial testing on the first day of life. | 175  |
| 8                 | Clinical analysis of ten pregnant                                                                                                                                           | Cao et al.     | China   | 4                          | 1                            | 0                               | 3                               | 0                                 | COVID-19 is not an                                                                                                            | 176  |

| Number of study | Title                                                                                 | Authors           | Country | N of woman with SARS-CoV-2 | Total neonates vaginal birth | Infected neonates vaginal birth | Total neonates caesarean birth | Infected neonates caesarean birth | Author's conclusion                                                                                                                      | Ref. |
|-----------------|---------------------------------------------------------------------------------------|-------------------|---------|----------------------------|------------------------------|---------------------------------|--------------------------------|-----------------------------------|------------------------------------------------------------------------------------------------------------------------------------------|------|
|                 | women with COVID-19 in Wuhan, China: A retrospective study                            |                   |         |                            |                              |                                 |                                |                                   | indication of cesarean section.                                                                                                          |      |
| 9               | Clinical analysis of pregnant women with 2019 novel coronavirus pneumonia             | Chen et al.       | China   | 5                          | 3                            | 0                               | 2                              | 0                                 | No complications were observed in the newborn. Pregnancy and perinatal outcomes of patients with COVID-19 should receive more attention. | 177  |
| 10              | Coronavirus Disease 2019 in Pregnancy: The Experience at an Urban Safety Net Hospital | Dhuyvetter et al. | USA     | 21                         | 15                           | 0                               | 6                              | 0                                 | Despite these risk factors, the patients uniformly had either mild or asymptomatic disease.                                              | 178  |
| 11              | Outcomes of Neonates Born to Mothers With Severe Acute Respiratory                    | Dumitriu et al.   | USA     | 101                        | 55                           | 0                               | 46                             | 0                                 | No clinical evidence of vertical transmission was identified                                                                             | 179  |

| Number of study | Title                                                                                                                                                            | Authors       | Country | N of woman with SARS-CoV-2 | Total neonates vaginal birth | Infected neonates vaginal birth | Total neonates caesarean birth | Infected neonates caesarean birth | Author's conclusion                                                                                              | Ref. |
|-----------------|------------------------------------------------------------------------------------------------------------------------------------------------------------------|---------------|---------|----------------------------|------------------------------|---------------------------------|--------------------------------|-----------------------------------|------------------------------------------------------------------------------------------------------------------|------|
|                 | Syndrome Coronavirus 2 Infection at a Large Medical Center in New York City                                                                                      |               |         |                            |                              |                                 |                                |                                   | in newborns of mothers positive for SARS-CoV-2 or with suspected infection.                                      |      |
| 12              | Assessment of Maternal and Neonatal SARS-CoV-2 Viral Load, Transplacental Antibody Transfer, and Placental Pathology in Pregnancies During the COVID-19 Pandemic | Edlow et al.  | Israel  | 57                         | 36                           | 0                               | 21                             | 0                                 | The study indicated no evidence of placental infection or definitive vertical transmission of SARS-CoV-2.        | 180  |
| 13              | Severe Acute Respiratory Syndrome Coronavirus 2 (SARS-CoV-2) Antibodies at Delivery in Women, Partners, and Newborns                                             | Egerup et al. | Denmark | 28                         | 22                           | 0                               | 6                              | 0                                 | In this study authors found no association between SARS-CoV-2 infection and obstetric or neonatal complications. | 181  |

| Number of study | Title                                                                                                                                | Authors           | Country  | N of woman with SARS-CoV-2 | Total neonates vaginal birth | Infected neonates vaginal birth | Total neonates caesarean birth | Infected neonates caesarean birth | Author's conclusion                                                                                                          | Ref. |
|-----------------|--------------------------------------------------------------------------------------------------------------------------------------|-------------------|----------|----------------------------|------------------------------|---------------------------------|--------------------------------|-----------------------------------|------------------------------------------------------------------------------------------------------------------------------|------|
| 14              | Vaginal delivery in SARS-CoV-2-infected pregnant women in Northern Italy: a retrospective analysis                                   | Ferrazzi et al.   | Italy    | 42                         | 24                           | 2                               | 18                             | 1                                 | The report showed that vaginal delivery is associated with a low risk of intrapartum SARS-Cov-2 transmission to the newborn. | 182  |
| 15              | Systematic screening for SARS-CoV-2 in pregnant women admitted for delivery in a Portuguese maternity                                | Figueiredo et al. | Portugal | 184                        | 126                          | 0                               | 58                             | 0                                 | Systematic screening for SARS-CoV-2 is very important aspect because of asymptomatic infection.                              | 183  |
| 16              | The Impact of COVID-19 Infection on Labor and Delivery, Newborn Nursery, and Neonatal Intensive Care Unit: Prospective Observational | Griffin et al.    | USA      | 27                         | 17                           | 0                               | 10                             | 0                                 | No infants had clinical evidence of symptomatic COVID-19 infection, but 14 of them were positive for SARS-CoV-2.             | 184  |

| Number of study | Title                                                                                                                                                        | Authors      | Country | N of woman with SARS-CoV-2 | Total neonates vaginal birth | Infected neonates vaginal birth | Total neonates caesarean birth | Infected neonates caesarean birth | Author's conclusion                                                                                                                          | Ref. |
|-----------------|--------------------------------------------------------------------------------------------------------------------------------------------------------------|--------------|---------|----------------------------|------------------------------|---------------------------------|--------------------------------|-----------------------------------|----------------------------------------------------------------------------------------------------------------------------------------------|------|
|                 | Data from a Single Hospital System                                                                                                                           |              |         |                            |                              |                                 |                                |                                   |                                                                                                                                              |      |
| 17              | Maternal, fetal and neonatal outcomes of large series of SARS-CoV-2 positive pregnancies in peripartum period: A single-center prospective comparative study | Hcini et al. |         | 108                        | 101                          | 3                               | 7                              | 1                                 | Neonate from positive SARS-CoV-2 mothers had no outcomes and were SARS-CoV-2 negative                                                        | 185  |
| 18              | Managing Preterm Infants Born to COVID-19 Mothers: Evidence from a Retrospective Cohort Study in Wuhan, China                                                | Hu et al.    | China   | 6                          | 1                            | 0                               | 5                              | 0                                 | The risk of vertical transmission of SARS-CoV-2 is low in preterm infants born to COVID-19 mothers if appropriate management is implemented. | 186  |
| 19              | Severe Acute Respiratory Syndrome Coronavirus 2                                                                                                              | Hu et al.    | China   | 7                          | 1                            | 0                               | 6                              | 1                                 | The findings suggest that the vertical transmission of                                                                                       | 187  |

| Number of study | Title                                                                                                                                                                 | Authors       | Country | N of woman with SARS-CoV-2 | Total neonates vaginal birth | Infected neonates vaginal birth | Total neonates caesarean birth | Infected neonates caesarean birth | Author's conclusion                                                                                                                                                    | Ref. |
|-----------------|-----------------------------------------------------------------------------------------------------------------------------------------------------------------------|---------------|---------|----------------------------|------------------------------|---------------------------------|--------------------------------|-----------------------------------|------------------------------------------------------------------------------------------------------------------------------------------------------------------------|------|
|                 | (SARS-CoV-2)<br>Vertical Transmission in Neonates Born to Mothers With Coronavirus Disease 2019 (COVID-19) Pneumonia                                                  |               |         |                            |                              |                                 |                                |                                   | SARS-CoV-2 infection from mothers affected by COVID-19 during the last days of pregnancy is possible but relatively infrequent.                                        |      |
| 20              | Characteristics and Outcomes of 241 Births to Women With Severe Acute Respiratory Syndrome Coronavirus 2 (SARS-CoV-2) Infection at Five New York City Medical Centers | Khoury et al. | USA     | 236                        | 136                          | 6                               | 100                            | 0                                 | COVID-19 severity was associated with higher rates of cesarean and preterm birth, but nearly all newborns tested were negative for SARS-CoV-2 immediately after birth. | 188  |
| 21              | Characteristics and outcomes of pregnant women admitted to                                                                                                            | Knight et al. | UK      | 262                        | 106                          | 4                               | 156                            | 8                                 | Most pregnant women had good outcomes, and                                                                                                                             | 189  |



| Number of study | Title                                                                                                                                                                 | Authors       | Country | N of woman with SARS-CoV-2 | Total neonates vaginal birth | Infected neonates vaginal birth | Total neonates caesarean birth | Infected neonates caesarean birth | Author's conclusion                                                                                                    | Ref. |
|-----------------|-----------------------------------------------------------------------------------------------------------------------------------------------------------------------|---------------|---------|----------------------------|------------------------------|---------------------------------|--------------------------------|-----------------------------------|------------------------------------------------------------------------------------------------------------------------|------|
|                 | hospital with confirmed SARS-CoV-2 infection in UK: national population based cohort study                                                                            |               |         |                            |                              |                                 |                                |                                   | transmission of SARS-CoV-2 to infants was uncommon.                                                                    |      |
| 22              | Clinical Analysis of Neonates Born to Mothers with or without COVID-19: A Retrospective Analysis of 48 Cases from Two Neonatal Intensive Care Units in Hubei Province | Liu W. et al. | China   | 15                         | 1                            | 0                               | 14                             | 0                                 | No evidence of vertical transmission was found in the study.                                                           | 190  |
| 23              | Clinical characteristics of 19 neonates born to mothers with COVID-19                                                                                                 | Liu W. et al. | China   | 19                         | 1                            | 0                               | 18                             | 0                                 | In this study no vertical transmission of SARS-CoV-2 and no perinatal complications in the third trimester was found . | 191  |

| Number of study | Title                                                                                                                                | Authors               | Country | N of woman with SARS-CoV-2 | Total neonates vaginal birth | Infected neonates vaginal birth | Total neonates caesarea n birth | Infected neonates caesarean birth | Author's conclusion                                                                                                              | Ref. |
|-----------------|--------------------------------------------------------------------------------------------------------------------------------------|-----------------------|---------|----------------------------|------------------------------|---------------------------------|---------------------------------|-----------------------------------|----------------------------------------------------------------------------------------------------------------------------------|------|
| 24              | Coronavirus and birth in Italy: results of a national population-based cohort study                                                  | Maraschini et al.     | Italy   | 146                        | 98                           | 4                               | 48                              | 1                                 | Clinical features and outcomes of COVID-19 in women and their infants are similar to those described for the general population. | 192  |
| 25              | Association Between Mode of Delivery Among Pregnant Women With COVID-19 and Maternal and Neonatal Outcomes in Spain                  | Martínez-Perez et al. | Spain   | 78                         | 41                           | 0                               | 37                              | 2                                 | None newborns developed COVID-19 symptoms within 10 days after birth, all tested samples were negative.                          | 193  |
| 26              | Maternal, Perinatal and Neonatal Outcomes With COVID-19: A Multicenter Study of 242 Pregnancies and Their 248 Infant Newborns During | Marín Gabriel et al.  | Spain   | 242                        | 179                          | 9                               | 63                              | 2                                 | In this study no COVID-19 transmission during delivery or throughout the first month of life in the newborns was detected.       | 194  |

| Number of study           | Title                                                                                                        | Authors              | Country | N of woman with SARS-CoV-2 | Total neonates vaginal birth | Infected neonates vaginal birth | Total neonates caesarean birth | Infected neonates caesarean birth | Author's conclusion                                                                                                                                    | Ref. |
|---------------------------|--------------------------------------------------------------------------------------------------------------|----------------------|---------|----------------------------|------------------------------|---------------------------------|--------------------------------|-----------------------------------|--------------------------------------------------------------------------------------------------------------------------------------------------------|------|
| Their First Month of Life |                                                                                                              |                      |         |                            |                              |                                 |                                |                                   |                                                                                                                                                        |      |
| 27                        | Multicentre Spanish study found no incidences of viral transmission in infants born to mothers with COVID-19 | Marín Gabriel et al. | Spain   | 42                         | 22                           | 0                               | 20                             | 0                                 | There was no evidence of COVID-19 transmission in any of the infants born to COVID-19 mothers.                                                         | 195  |
| 28                        | Characteristics of Newborns Born to SARS-CoV-2-Positive Mothers: A Retrospective Cohort Study                | Mohsen et al.        | USA     | 15                         | 5                            | 0                               | 10                             | 1                                 | Neonates born to mothers with confirmed or suspected SARS-CoV-2 are most of the time asymptomatic. Vertical transmission should be studied thoroughly. | 196  |
| 29                        | Vertical Transmission of COVID-19 to the Neonate                                                             | Moreno et al.        | USA     | 19                         | 12                           | 0                               | 7                              | 0                                 | In this report, symptomatic COVID-19 during the                                                                                                        | 197  |

| Number of study | Title                                                                                                    | Authors        | Country | N of woman with SARS-CoV-2 | Total neonates vaginal birth | Infected neonates vaginal birth | Total neonates caesarean birth | Infected neonates caesarean birth | Author's conclusion                                                                                                                                         | Ref. |
|-----------------|----------------------------------------------------------------------------------------------------------|----------------|---------|----------------------------|------------------------------|---------------------------------|--------------------------------|-----------------------------------|-------------------------------------------------------------------------------------------------------------------------------------------------------------|------|
|                 |                                                                                                          |                |         |                            |                              |                                 |                                |                                   | pregnancy was not associated with vertical transmission to the neonate.                                                                                     |      |
| 30              | Clinical features and the maternal and neonatal outcomes of pregnant women with coronavirus disease 2019 | Nie et al.     | China   | 27                         | 5                            | 0                               | 22                             | 1                                 | The risk of perinatal transmission of SARS-CoV-2 was low. Only 1 out of 26 newborns had confirmed SARS-CoV-2 infection.                                     | 198  |
| 31              | A neonatal cluster of novel coronavirus disease 2019: clinical management and considerations             | Olivini et al. | Italy   | 5                          | 2                            | 2                               | 3                              | 2                                 | This study indicated that affected neonates were asymptomatic or paucisymptomatic. Despite these reassuring findings, a few cases of severe presentation in | 199  |

| Number of study | Title                                                                                                                                                | Authors         | Country  | N of woman with SARS-CoV-2 | Total neonates vaginal birth | Infected neonates vaginal birth | Total neonates caesarean birth | Infected neonates caesarean birth | Author's conclusion                                                                                   | Ref. |
|-----------------|------------------------------------------------------------------------------------------------------------------------------------------------------|-----------------|----------|----------------------------|------------------------------|---------------------------------|--------------------------------|-----------------------------------|-------------------------------------------------------------------------------------------------------|------|
|                 |                                                                                                                                                      |                 |          |                            |                              |                                 |                                |                                   | the neonatal population have been reported.                                                           |      |
| 23              | A multicenter study on epidemiological and clinical characteristics of 125 newborns born to women infected with COVID-19 by Turkish Neonatal Society | Oncel et al.    | Turkey   | 125                        | 36                           | 1                               | 89                             | 3                                 | COVID-19 in pregnant women has important impact on perinatal and neonatal outcomes.                   | 200  |
| 33              | Clinical course of Coronavirus Disease-2019 (COVID-19) in pregnancy                                                                                  | Pereira et al.. | Spain    | 23                         | 18                           | 0                               | 5                              | 0                                 | No vertical or horizontal transmissions were diagnosed in the neonates during labor or breastfeeding. | 201  |
| 34              | Perinatal management of SARS-CoV-2 infection in a level III                                                                                          | Pissarra et al. | Portugal | 10                         | 6                            | 0                               | 4                              | 0                                 | No newborn developed clinical signs of infection and no evidence of vertical                          | 202  |

| Number of study | Title                                                                                                                            | Authors          | Country | N of woman with SARS-CoV-2 | Total neonates vaginal birth | Infected neonates vaginal birth | Total neonates caesarean birth | Infected neonates caesarean birth | Author's conclusion                                                                                                                                                    | Ref. |
|-----------------|----------------------------------------------------------------------------------------------------------------------------------|------------------|---------|----------------------------|------------------------------|---------------------------------|--------------------------------|-----------------------------------|------------------------------------------------------------------------------------------------------------------------------------------------------------------------|------|
|                 | University Hospital                                                                                                              |                  |         |                            |                              |                                 |                                |                                   | transmission was found.                                                                                                                                                |      |
| 35              | Pregnancy and postpartum outcomes in a universally tested population for SARS-CoV-2 in New York City: a prospective cohort study | Prabhu et al.    | USA     | 70                         | 38                           | 0                               | 32                             | 0                                 | The authors observed increased caesarean delivery rates and increased frequency of maternal complications in the postpartum period among pregnant women with COVID-19. | 203  |
| 36              | Coronavirus disease 2019 in pregnancy                                                                                            | Qiancheng et al. | China   | 22                         | 5                            | 0                               | 17                             | 0                                 | No evidence supported vertical transmission of COVID-19 in the late stage of pregnancy, including                                                                      | 204  |

| Number of study | Title                                                                                                                              | Authors              | Country | N of woman with SARS-CoV-2 | Total neonates vaginal birth | Infected neonates vaginal birth | Total neonates caesarean birth | Infected neonates caesarean birth | Author's conclusion                                                                                                                  | Ref. |
|-----------------|------------------------------------------------------------------------------------------------------------------------------------|----------------------|---------|----------------------------|------------------------------|---------------------------------|--------------------------------|-----------------------------------|--------------------------------------------------------------------------------------------------------------------------------------|------|
|                 |                                                                                                                                    |                      |         |                            |                              |                                 |                                |                                   | vaginal delivery.                                                                                                                    |      |
| 37              | Characteristics and short-term obstetric outcomes in a case series of 67 women tested positive for SARS-CoV-2 in Stockholm, Sweden | Remaeus et al.       | Sweden  | 67                         | 47                           | 1                               | 20                             | 2                                 | Sixty-seven test-positive women delivered SARS-CoV-2-negative healthy neonates by vaginal birth.                                     | 205  |
| 38              | Vaginal delivery in SARS-CoV-2-infected pregnant women in Israel: a multicenter prospective analysis                               | Rottenstreich et al. | Israel  | 52                         | 39                           | 0                               | 13                             | 0                                 | In this prospective study among SARS-CoV-2-infected mothers, all neonatal was negative, and none of the infants developed pneumonia. | 206  |
| 39              | Neonatal management and outcomes during the COVID-19                                                                               | Salvatore et al.     | USA     | 82                         | 46                           | 0                               | 36                             | 0                                 | This data suggest that perinatal transmission of                                                                                     | 207  |

| Number of study | Title                                                                                                                   | Authors         | Country | N of woman with SARS-CoV-2 | Total neonates vaginal birth | Infected neonates vaginal birth | Total neonates caesarean birth | Infected neonates caesarean birth | Author's conclusion                                                                                                            | Ref. |
|-----------------|-------------------------------------------------------------------------------------------------------------------------|-----------------|---------|----------------------------|------------------------------|---------------------------------|--------------------------------|-----------------------------------|--------------------------------------------------------------------------------------------------------------------------------|------|
|                 | pandemic: an observation cohort study                                                                                   |                 |         |                            |                              |                                 |                                |                                   | COVID-19 is unlike because no neonates were positive for SARS-CoV-2.                                                           |      |
| 40              | Incidence and clinical profiles of COVID-19 pneumonia in pregnant women: A single-centre cohort study from Spain        | San-Juan et al. | Spain   | 6                          | 1                            | 0                               | 5                              | 0                                 | Pregnant women with COVID-19 have a high risk of developing pneumonia. No cases of neonatal SARS-CoV-2 transmission was found. | 208  |
| 41              | A pandemic center's experience of managing pregnant women with COVID-19 infection in Turkey: A prospective cohort study | Sahin et al.    | Turkey  | 10                         | 5                            | 0                               | 5                              | 0                                 | The clinical course of COVID 19 during pregnancy appears to be mild in the present study.                                      | 209  |



| Number of study | Title                                                                                                                                                                                                                                                    | Authors         | Country | N of woman with SARS-CoV-2 | Total neonates vaginal birth | Infected neonates vaginal birth | Total neonates caesarean birth | Infected neonates caesarean birth | Author's conclusion                                                                                                | Ref. |
|-----------------|----------------------------------------------------------------------------------------------------------------------------------------------------------------------------------------------------------------------------------------------------------|-----------------|---------|----------------------------|------------------------------|---------------------------------|--------------------------------|-----------------------------------|--------------------------------------------------------------------------------------------------------------------|------|
| 42              | Clinical Findings and Disease Severity in Hospitalized Pregnant Women With Coronavirus Disease 2019 (COVID-19)                                                                                                                                           | Savasi et al.   | Italy   | 56                         | 34                           | 3                               | 22                             | 1                                 | Preterm delivery occurred in 12% of patients, and nine newborns were admitted to the neonatal intensive care unit. | 210  |
| 43              | Chronic Histiocytic Intervillositis with Trophoblast Necrosis are Risk Factors Associated with Placental Infection from Coronavirus Disease 2019 (COVID-19) and Intrauterine Maternal-Fetal Severe Acute Respiratory Syndrome Coronavirus 2 (SARS-CoV-2) | Schwartz et al. |         | 6                          | 3                            | 3                               | 3                              | 2                                 | Potential mechanisms of infection of the placenta and fetus with SARS-CoV-2 are not confirmed.                     | 211  |

| Number of study | Title                                                                                          | Authors                                                                 | Country                                                                | N of woman with SARS-CoV-2 | Total neonates vaginal birth | Infected neonates vaginal birth | Total neonates caesarea n birth | Infected neonates caesarean birth | Author's conclusion                                                           | Ref. |
|-----------------|------------------------------------------------------------------------------------------------|-------------------------------------------------------------------------|------------------------------------------------------------------------|----------------------------|------------------------------|---------------------------------|---------------------------------|-----------------------------------|-------------------------------------------------------------------------------|------|
|                 | Transmission in Liveborn and Stillborn Infants                                                 |                                                                         |                                                                        |                            |                              |                                 |                                 |                                   |                                                                               |      |
| 44              | Coronavirus disease 2019 in pregnancy was associated with maternal morbidity and preterm birth | Sentilhes et al.                                                        | France                                                                 | 17                         | 10                           | 0                               | 7                               | 0                                 | All neonates tested were negative for SARS-CoV-2.                             | 212  |
| 45              | Clinical course of novel COVID-19 infection in pregnant women                                  | Shmakov et al.                                                          | Russia                                                                 | 40                         | 23                           | 0                               | 17                              | 0                                 | No evidence of vertical transmission during pregnancy and delivery was found. | 213  |
| 46              | Maternal and Perinatal Outcomes of Pregnant Women with SARS-COV-2 infection                    | The WAPM (The World Association of Perinatal Medicine) working group on | 22 different countries (Argentina, Australia, Belgium, Brazil, Colombi | 251                        | 115                          | 1                               | 136                             | 0                                 | The risk of vertical transmission seems to be negligible.                     | 214  |

| Number<br>of<br>study | Title | Authors  | Country                                                                                                                                                                                                                                                                | N of<br>woman<br>with<br>SARS-<br>CoV-2 | Total<br>neonates<br>vaginal<br>birth | Infected<br>neonates<br>vaginal<br>birth | Total<br>neonates<br>caesarea<br>n birth | Infected<br>neonates<br>caesarean<br>birth | Author's<br>conclusion | Ref. |
|-----------------------|-------|----------|------------------------------------------------------------------------------------------------------------------------------------------------------------------------------------------------------------------------------------------------------------------------|-----------------------------------------|---------------------------------------|------------------------------------------|------------------------------------------|--------------------------------------------|------------------------|------|
|                       |       | COVID-19 | a, Czech Republic<br>,<br>Finland,<br>German<br>y,<br>Greece,<br>Israel,<br>Italy,<br>North<br>Macedo<br>nia,<br>Peru,<br>Portugal<br>,<br>Republic<br>of<br>Kosovo,<br>Romania<br>, Russia,<br>Serbia,<br>Slovenia<br>, Spain,<br>Turkey,<br>and<br>United<br>States) |                                         |                                       |                                          |                                          |                                            |                        |      |

| Number of study | Title                                                                                                             | Authors        | Country | N of woman with SARS-CoV-2 | Total neonates vaginal birth | Infected neonates vaginal birth | Total neonates caesarea n birth | Infected neonates caesarean birth | Author's conclusion                                                                                                                                                     | Ref. |
|-----------------|-------------------------------------------------------------------------------------------------------------------|----------------|---------|----------------------------|------------------------------|---------------------------------|---------------------------------|-----------------------------------|-------------------------------------------------------------------------------------------------------------------------------------------------------------------------|------|
| 47              | Outcomes of Maternal-Newborn Dyads After Maternal SARS-CoV-2                                                      | Verma et al.   | USA     | 152                        | 113                          | 0                               | 39                              | 0                                 | There was no distinct evidence of vertical transmission from mothers with SARS-CoV-2 to their newborns.                                                                 | 215  |
| 48              | Retrospective Description of Pregnant Women Infected with Severe Acute Respiratory Syndrome Coronavirus 2, France | Vivanti et al. | France  | 33                         | 17                           | 1                               | 16                              | 0                                 | In addition to maternal respiratory symptoms, neonatal conditions related to spontaneous or induced prematurity in relation to SARS-CoV-2 infection must be considered. | 216  |
| 49              | Neonatal outcome in 29 pregnant women with COVID-19: A retrospective                                              | Wu et al.      | China   | 29                         | 2                            | 0                               | 27                              | 5                                 | The findings suggest that intrauterine or intrapartum transmission is                                                                                                   | 216  |

| Number of study | Title                                                                                                                     | Authors      | Country | N of woman with SARS-CoV-2 | Total neonates vaginal birth | Infected neonates vaginal birth | Total neonates caesarean birth | Infected neonates caesarean birth | Author's conclusion                                                                                             | Ref. |
|-----------------|---------------------------------------------------------------------------------------------------------------------------|--------------|---------|----------------------------|------------------------------|---------------------------------|--------------------------------|-----------------------------------|-----------------------------------------------------------------------------------------------------------------|------|
|                 | study in Wuhan, China                                                                                                     |              |         |                            |                              |                                 |                                |                                   | possible and warrants clinical caution and further investigation.                                               |      |
| 50              | Coronavirus disease 2019 among pregnant Chinese women: case series data on the safety of vaginal birth and breastfeeding  | Wu Y. et al. | China   | 3                          | 1                            | 0                               | 2                              | 0                                 | This case series indicated that vaginal delivery may be a safe delivery option.                                 | 217  |
| 51              | Clinical Manifestation and Neonatal Outcomes of Pregnant Patients With Coronavirus Disease 2019 Pneumonia in Wuhan, China | Xu et al.    | China   | 23                         | 5                            | 0                               | 18                             | 0                                 | No evidence indicated that pregnant women may have fetal infection through vertical transmission of SARS-CoV-2. | 218  |
| 52              | Coronavirus disease 2019 in pregnant women: a report based on 116 cases                                                   | Yan et al.   | China   | 99                         | 14                           | 0                               | 85                             | 0                                 | There is no evidence of vertical transmission of                                                                | 219  |

| Number of study | Title                                                                                                                                                     | Authors     | Country | N of woman with SARS-CoV-2 | Total neonates vaginal birth | Infected neonates vaginal birth | Total neonates caesarea n birth | Infected neonates caesarean birth | Author's conclusion                                                                                     | Ref. |
|-----------------|-----------------------------------------------------------------------------------------------------------------------------------------------------------|-------------|---------|----------------------------|------------------------------|---------------------------------|---------------------------------|-----------------------------------|---------------------------------------------------------------------------------------------------------|------|
|                 |                                                                                                                                                           |             |         |                            |                              |                                 |                                 |                                   | SARS-CoV-2 infection.                                                                                   |      |
| 53              | Effects of Severe Acute Respiratory Syndrome Coronavirus 2 Infection on Pregnant Women and Their Infants                                                  | Yang et al. | China   | 23                         | 5                            | 0                               | 18                              | 0                                 | There was no distinct evidence of vertical transmission from mothers with SARS-CoV-2 to their newborns. | 220  |
| 54              | Pregnant women with COVID-19 and risk of adverse birth outcomes and maternal-fetal vertical transmission: a population-based cohort study in Wuhan, China | Yang et al. | China   | 65                         | 13                           | 0                               | 52                              | 0                                 | The data provide little evidence for maternal-fetal vertical transmission of SARS-CoV-2.                | 221  |
| 55              | Clinical features and outcomes of pregnant women suspected of coronavirus disease 2019                                                                    | Yang et al. | China   | 13                         | 4                            | 0                               | 9                               | 0                                 | The clinical symptoms and laboratory indicators are not obvious for                                     | 222  |

| Number of study | Title                                                                                                                          | Authors      | Country | N of woman with SARS-CoV-2 | Total neonates vaginal birth | Infected neonates vaginal birth | Total neonates caesarean birth | Infected neonates caesarean birth | Author's conclusion                                                                                    | Ref. |
|-----------------|--------------------------------------------------------------------------------------------------------------------------------|--------------|---------|----------------------------|------------------------------|---------------------------------|--------------------------------|-----------------------------------|--------------------------------------------------------------------------------------------------------|------|
|                 |                                                                                                                                |              |         |                            |                              |                                 |                                |                                   | asymptomatic and mild COVID-19 pregnant women.                                                         |      |
| 56              | Severe Acute Respiratory Syndrome Coronavirus 2 (SARS-CoV-2) Infection During Pregnancy In China: A Retrospective Cohort Study | Yin et al.   | China   | 17                         | 4                            | 0                               | 13                             | 0                                 | There was no evidence of vertical transmission during pregnancy with SARS-CoV-2 infection.             | 224  |
| 57              | Update on clinical outcomes of women with COVID-19 during pregnancy                                                            | Zeng et al.  | China   | 16                         | 4                            | 0                               | 12                             | 0                                 | There was no distinct evidence of vertical transmission from mothers with SARS-CoV-2 to their newborns | 225  |
| 58              | Severe acute respiratory syndrome coronavirus                                                                                  | Zhang et al. | China   | 18                         | 1                            | 0                               | 17                             | 0                                 | Vertical transmission of                                                                               | 226  |

| Number<br>of<br>study | Title                                                                                                      | Authors    | Country | N of<br>woman<br>with<br>SARS-<br>CoV-2 | Total<br>neonates<br>vaginal<br>birth | Infected<br>neonates<br>vaginal<br>birth | Total<br>neonates<br>caesarea<br>n birth | Infected<br>neonates<br>caesarean<br>birth | Author's<br>conclusion                                            | Ref. |
|-----------------------|------------------------------------------------------------------------------------------------------------|------------|---------|-----------------------------------------|---------------------------------------|------------------------------------------|------------------------------------------|--------------------------------------------|-------------------------------------------------------------------|------|
|                       | 2(SARS-CoV-2)<br>infection during<br>late pregnancy: a<br>report of 18<br>patients<br>from Wuhan,<br>China |            |         |                                         |                                       |                                          |                                          |                                            | SARS-CoV-2<br>was not<br>detected.                                |      |
| 59                    | Clinical analysis of<br>10 neonates born<br>to mothers with<br>2019-nCoV<br>pneumonia                      | Zhu et al. | China   | 9                                       | 2                                     | 0                                        | 7                                        | 0                                          | Vertical<br>transmission of<br>SARS-CoV-2<br>was not<br>detected. | 227  |
